# Supplementary material
Source: HighWire-hosted journal article supplement (https://bmjopen.bmj.com/content/12/6/e057890)
Supplement: inline-supplementary-material-1 [file inline-supplementary-material-1.pdf]

## Supplemental file

### S1. Confusion Assessment method for the ICU (CAM-ICU) tool

#### English Version

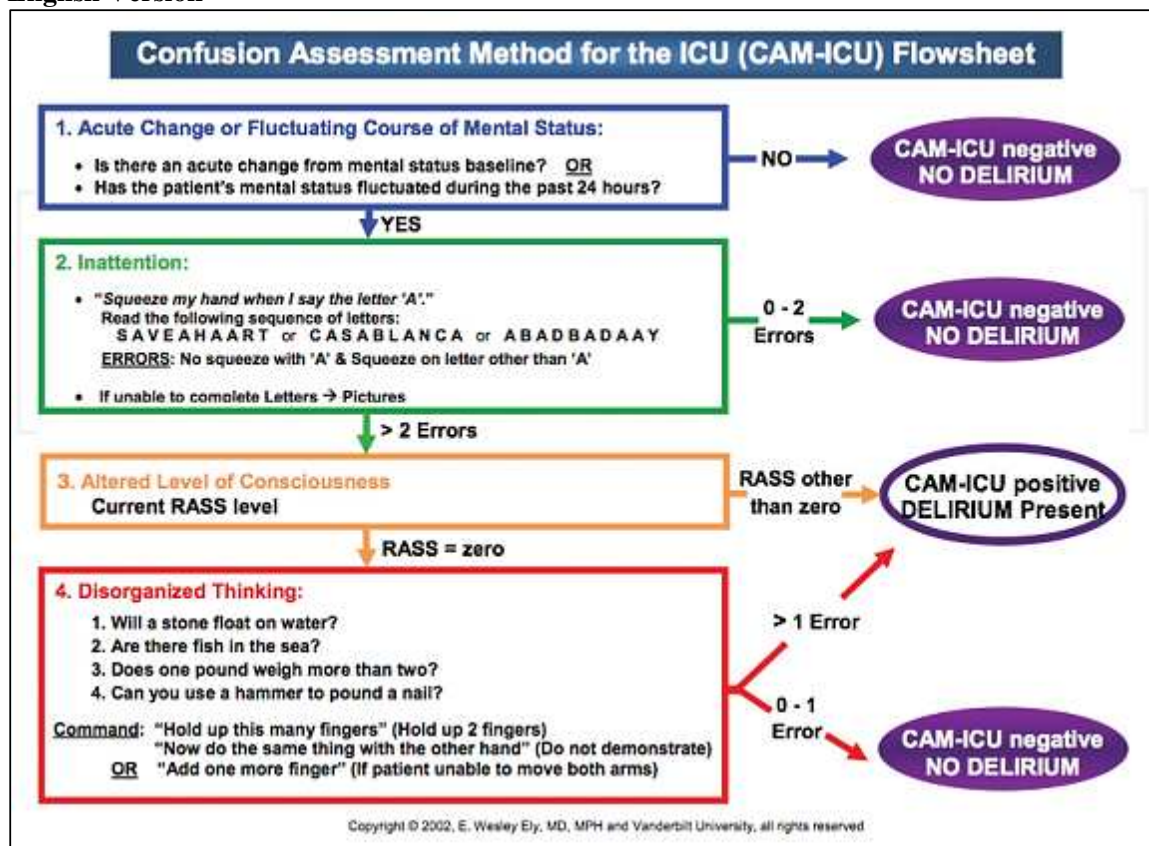

Ely EW, Margolin R, Francis, J, et al. Evaluation of delirium in critically ill patients: Validation of the Confusion Assessment Method for the Intensive Care Unit (CAM-ICU). *Crit Care Med* 2001;29:1370–9. [https://doi: 10.1097/00003246-200107000-00012](https://doi.org/10.1097/00003246-200107000-00012).

## Thai Version

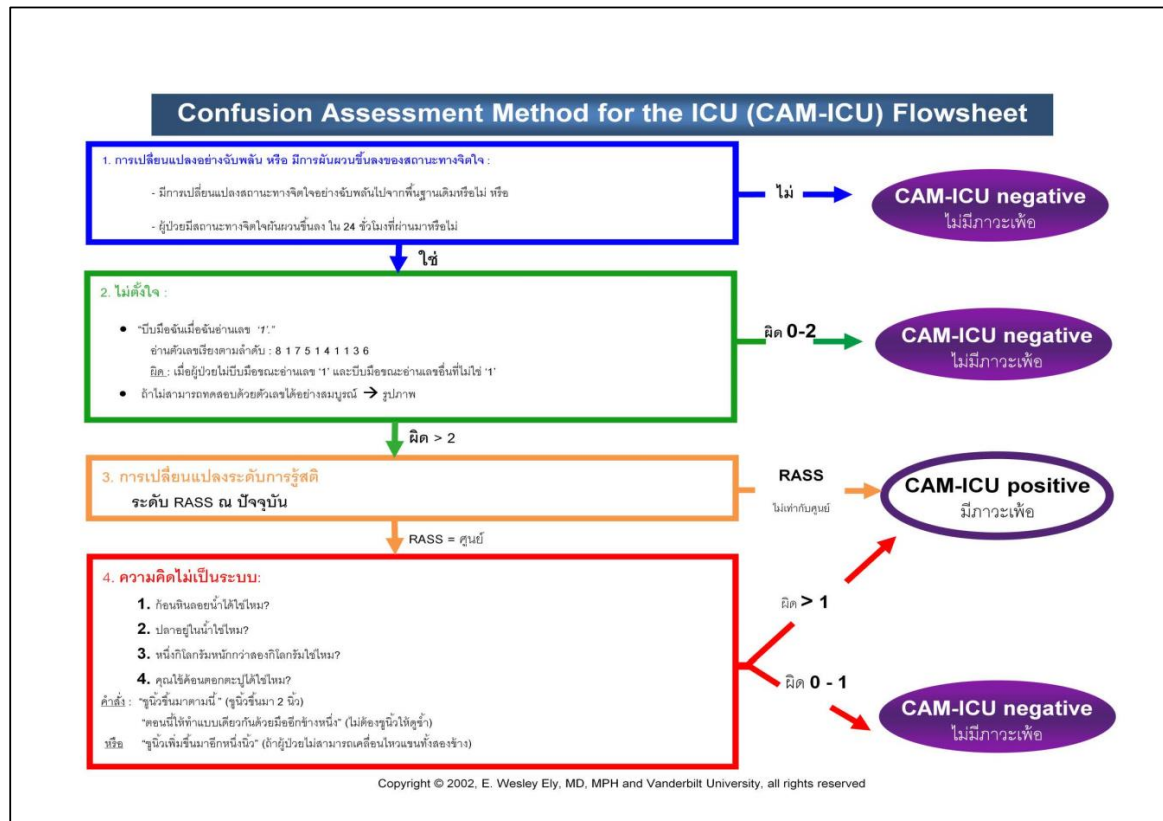

Pipamekaporn T, Wongpakaran N, Mueankwan S, et al. Validity and reliability of the Thai version of the Confusion Assessment Method for the Intensive Care Unit (CAM-ICU). *Clin Interv Aging* 2014;9:879–85. [https://doi:10.2147/CIA.S62660](https://doi.org/10.2147/CIA.S62660).
